# Supplementary material for: Zinc in Wheat Grain, Processing, and Food
Source: PubMed Central journal article supplement (PMC7471629; doi:10.3389/fnut.2020.00124), 2020-08-18
Supplement: Image_1.pdf [file Image_1.pdf]

## Zinc in wheat grain, processing, and food

Min Wang, Fanmei Kong, Rui Liu, Qingqi Fan, Xiaocun Zhang

### Supplementary Figures

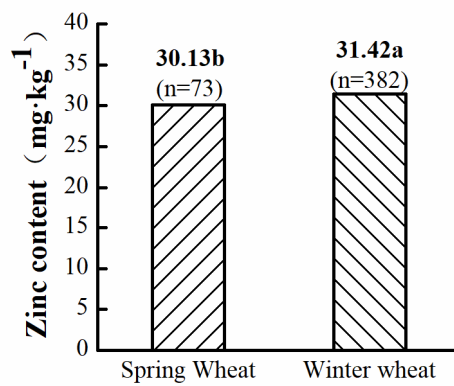

**Figure S1** Zinc content in spring and winter wheat

Note: The letters a and b indicate a significant difference at the level of  $P < 0.05$ ; n is the total number of samples.

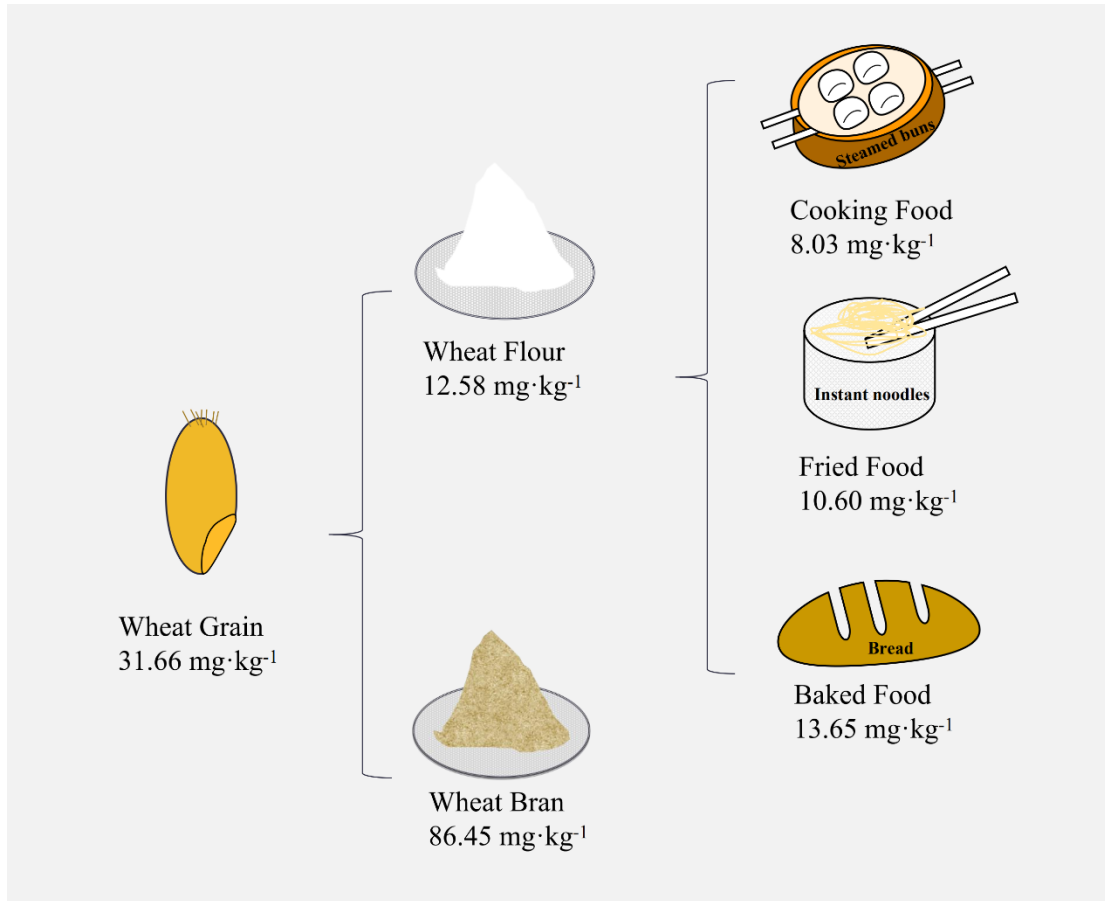

**Figure S2** Distribution of Zn in wheat grain and its processing foods
